# Supplementary material for: UNR/CSDE1 Expression Is Critical to Maintain Invasive Phenotype of Colorectal Cancer through Regulation of c-MYC and Epithelial-to-Mesenchymal Transition
Source: PubMed Central journal article supplement (PMC6517883; doi:10.3390/jcm8040560), 2019-04-25
Supplement: jcm-08-00560-s001.pdf [file jcm-08-00560-s001.pdf]

A

| UNR Hscore | Sensitivity | 1 - Specificity | AUC  |
|------------|-------------|-----------------|------|
| -1,00      | 1,000       | 1,000           | 0,00 |
| 5,00       | ,800        | ,500            | 0,40 |
| 12,50      | ,667        | ,450            | 0,37 |
| 17,50      | ,600        | ,450            | 0,33 |
| 25,00      | ,600        | ,350            | 0,39 |
| 35,00      | ,600        | ,250            | 0,45 |
| 45,00      | ,533        | ,200            | 0,43 |
| 55,00      | ,467        | ,100            | 0,42 |
| 65,00      | ,400        | ,100            | 0,36 |
| 75,00      | ,267        | ,100            | 0,24 |
| 85,00      | ,200        | ,100            | 0,18 |
| 115,00     | ,200        | ,050            | 0,19 |
| 150,00     | ,200        | 0,000           | 0,20 |
| 215,00     | ,133        | 0,000           | 0,13 |
| 277,50     | ,067        | 0,000           | 0,07 |
| 286,00     | 0,000       | 0,000           | 0,00 |

B

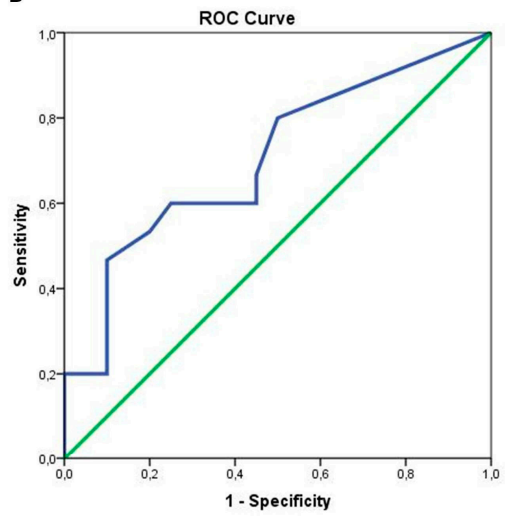

**Figure 1.** ROC curve of the analyzed training set according to UNR Hscore. (A) Table containing ROC curve estimation parameters. AUC: area under the curve. (B) ROC curve performed with UNR~Hscore.
